# Supplementary material for: ZmCIPK21, A Maize CBL-Interacting Kinase, Enhances Salt Stress Tolerance in Arabidopsis thaliana
Source: Int J Mol Sci. 2014 Aug 22;15(8):14819–34. doi: 10.3390/ijms150814819 (PMC4159884; doi:10.3390/ijms150814819)

## Supplementary Information

**Figure S1.** Sequence analysis of *ZmCIPK21*. **(A)** Comparison of five class II CIPK amino acid sequences. The black boxes indicate identical residues, and gray boxes indicate residues conserved among the proteins; **(B)** Phylogenetic relationship of *ZmCIPK21* and *Arabidopsis* CIPKs. Multiple sequence alignment was performed using MEGA4.1, and the phylogenetic tree was constructed following the neighbor-joining method using the amino acid sequence of each CIPK protein. The accession numbers of selected CIPKs are listed as follows: *ZmCIPK21*, GRMZM2G075002, NM\_00154244; *AtCIPK1*, NM\_112631; *AtCIPK21*, NM\_125144; *AtCIPK24*, NM\_125144; *AtCIPK23*, NM\_102766; *AtCIPK3*, NM\_128256; *AtCIPK9*, NM\_099996; *AtCIPK8*, NM\_118573; *AtCIPK17*, NM\_103723.

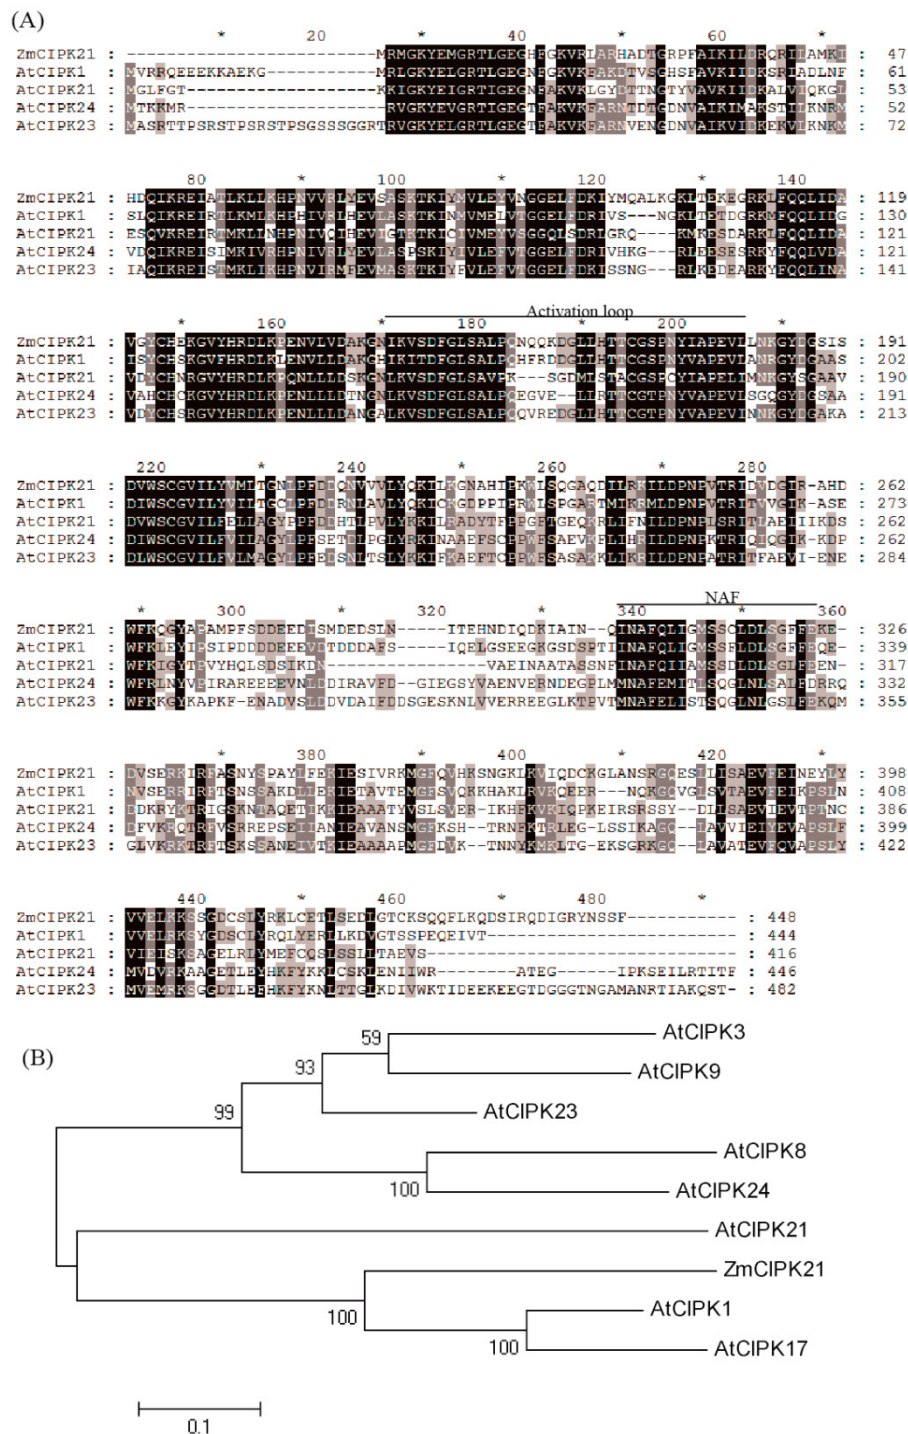

**Figure S2.** Expression of *ZmCIPK* in *ZmCIPK*-OE plants. The upper panel shows the RT-PCR analysis of 11 *ZmCIPK*-OE plants, with *actin* as an internal reference. Western blots of *ZmCIPK*-HA proteins are shown in the lower panels.

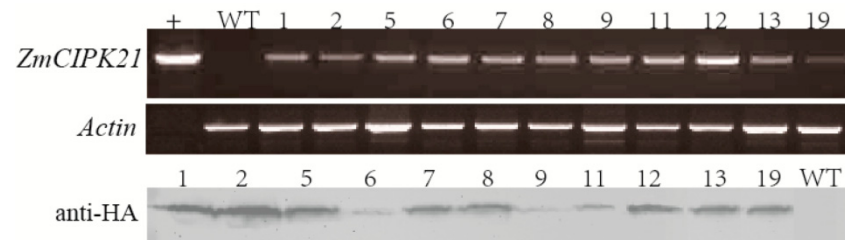

Supplement: Supplementary File 1 [file ijms-15-14819-s001.pdf]
